# Supplementary material
Source: Royal Society of Chemistry journal article supplement (doi:10.1039/d6qm00032k)
Supplement: d6qm00032k1.pdf [file d6qm00032k1.pdf]

## Electronic Supporting Information

### Strong Confinement via 2D-to-3D Zeolite Transformation Enables Blue-Emitting CsPbBr<sub>3</sub> Quantum Dots for Backlight Displays

Hongkai Li,<sup>a</sup> Yuchi Zhang,<sup>a</sup> Le Han,<sup>a</sup> Changshuai Gong,<sup>a</sup> Yan Xu<sup>a,b\*</sup>

<sup>a</sup>Department of Chemistry, College of Sciences, Northeastern University, Shenyang, Liaoning 110819, P. R. China

<sup>b</sup>Foshan Graduate School of Innovation, Northeastern University, Foshan, Guangdong, 528311, P. R. China.

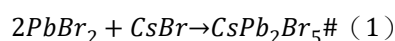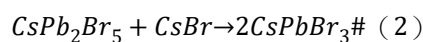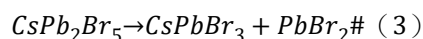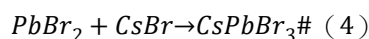

**Fig. S1** Reactions during the grinding and thermal diffusion process.<sup>1</sup>

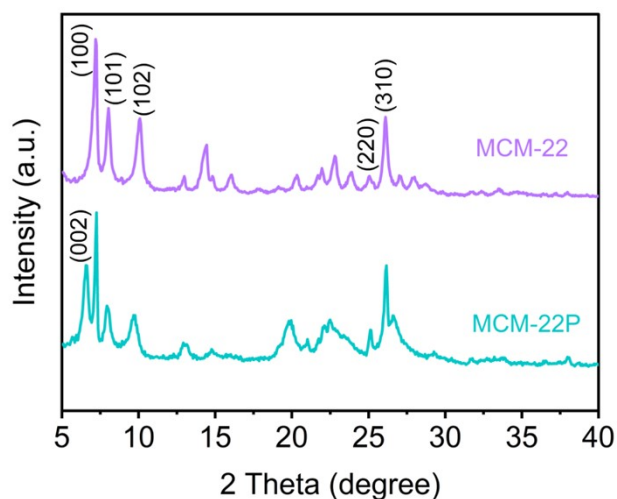

**Fig. S2** XRD patterns of MCM-22P and MCM-22.

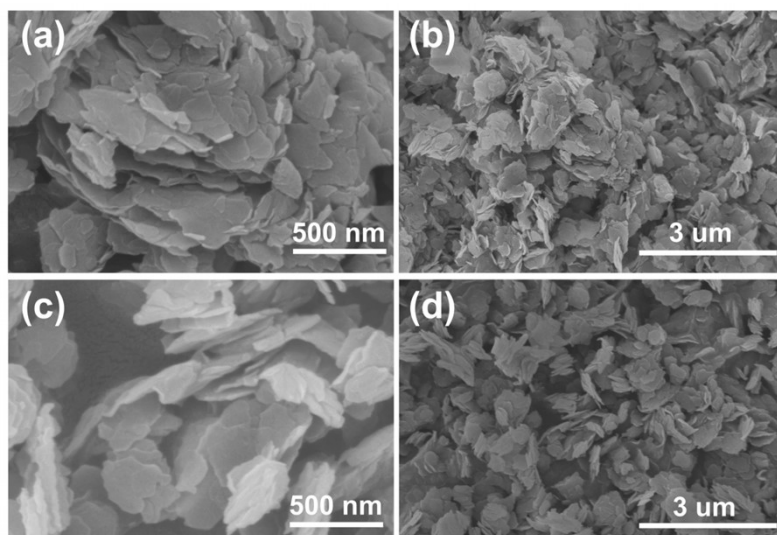

**Fig. S3** SEM images of (a-b) MCM-22P and (c-d) MCM-22.

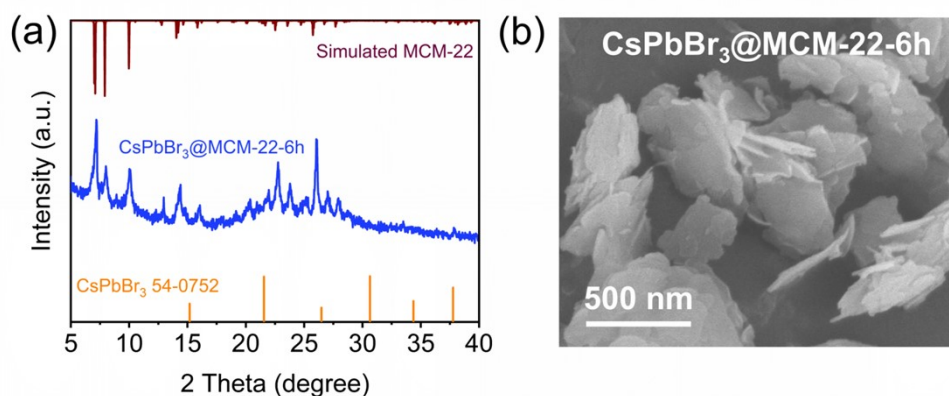

**Fig. S4** (a) XRD pattern and (b) SEM image of CsPbBr<sub>3</sub>@MCM-22-6h.

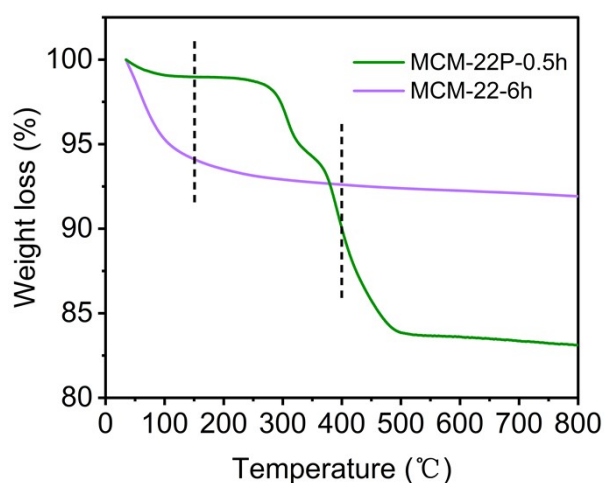

**Fig. S5** TG curves of MCM-22P-0.5h and MCM-22-6h obtained by calcining MCM-22P at 550 °C for 0.5 h and 6 h, respectively.

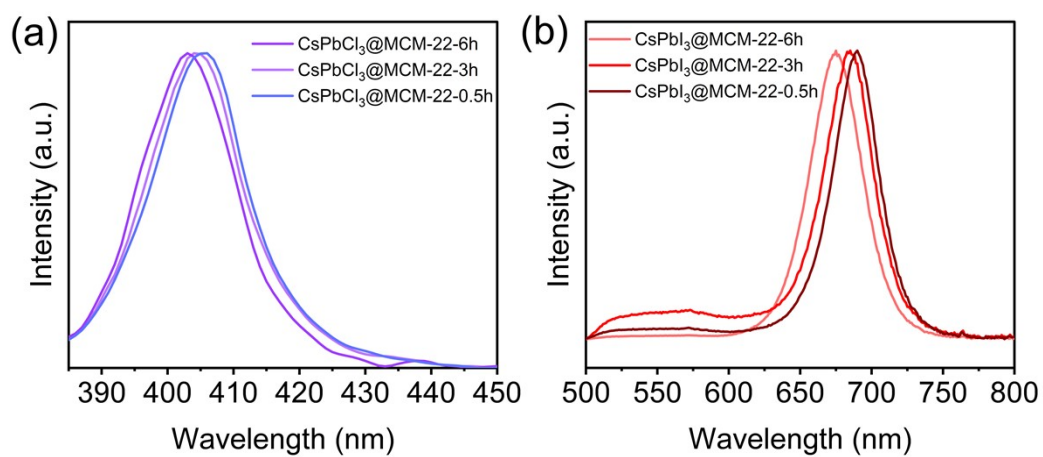

**Fig. S6** PL spectra of (a) CsPbCl<sub>3</sub>@MCM-22 and (b) CsPbI<sub>3</sub>@MCM-22 composites obtained from different calcination times ( $\lambda_{\text{ex}} = 365 \text{ nm}$ ).

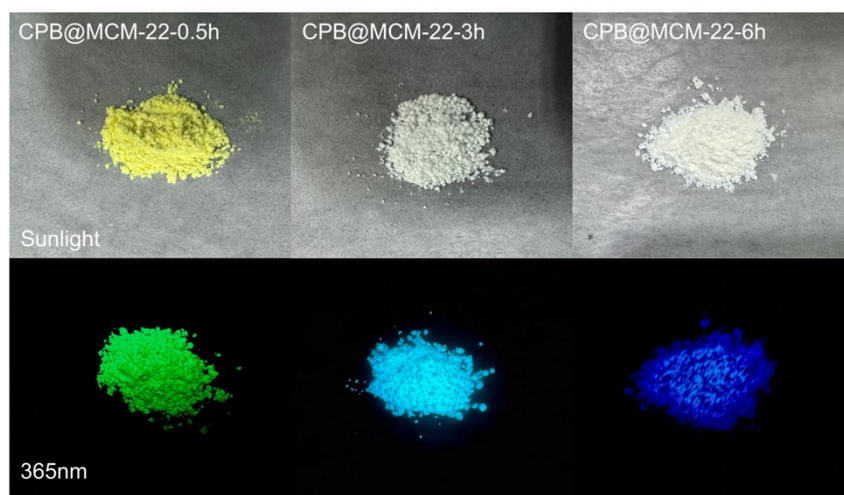

**Fig. S7** Photographs of CsPbBr<sub>3</sub>@MCM-22 composites taken at different calcination durations under sunlight and 365 nm UV lamp irradiation.

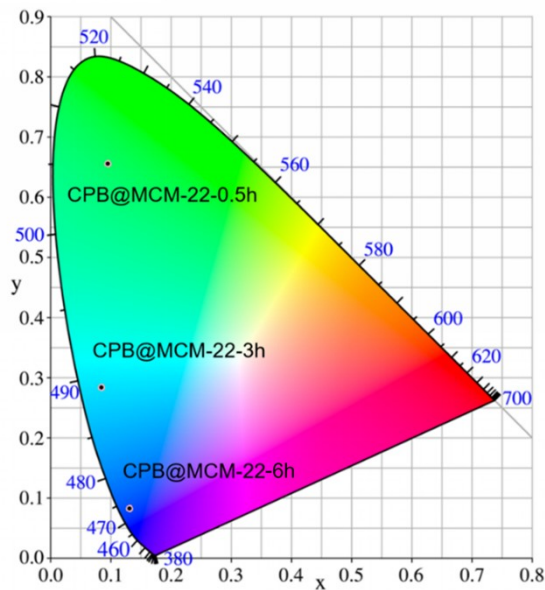

**Fig. S8** CIE diagram of  $\text{CsPbBr}_3$ @MCM-22 composites obtained with varying calcination durations.

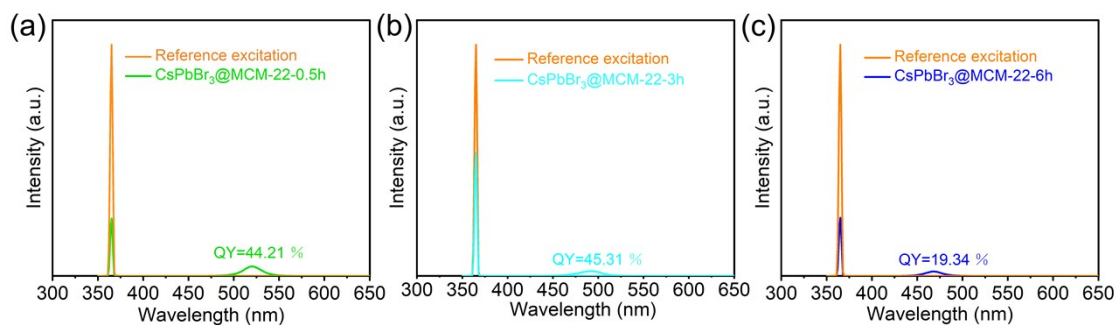

**Fig. S9** PLQY of (a)  $\text{CsPbBr}_3$ @MCM-22-0.5h, (b)  $\text{CsPbBr}_3$ @MCM-22-3h, and (c)  $\text{CsPbBr}_3$ @MCM-22-6h, respectively.

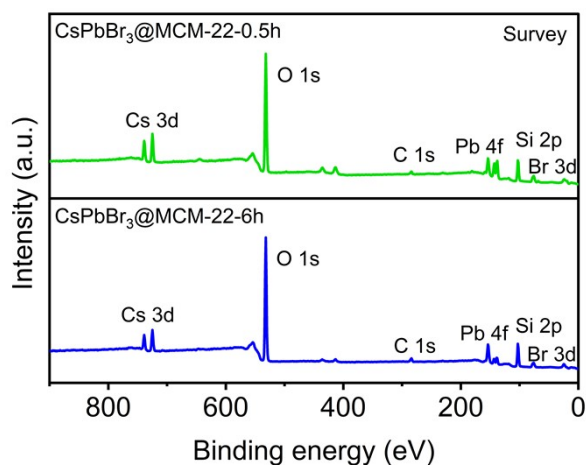

**Fig. S10** XPS survey spectra of  $\text{CsPbBr}_3$ @MCM-22-0.5h and  $\text{CsPbBr}_3$ @MCM-22-6h.

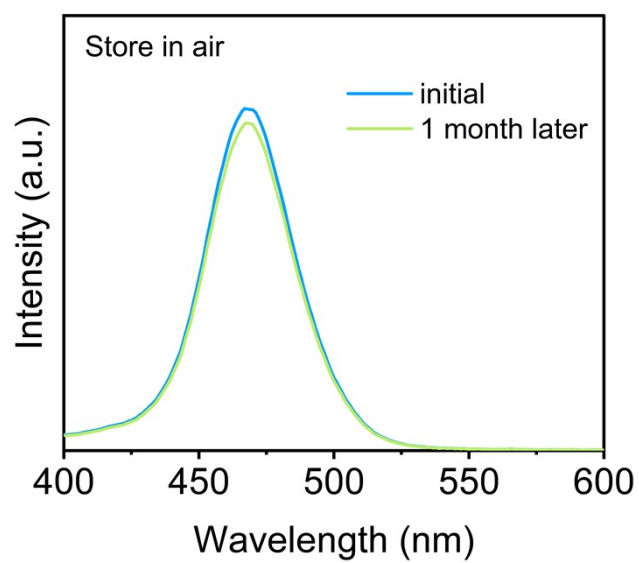

**Fig. S11** Fluorescence spectra of CsPbBr<sub>3</sub>@MCM-22-6h in air before and after one month.

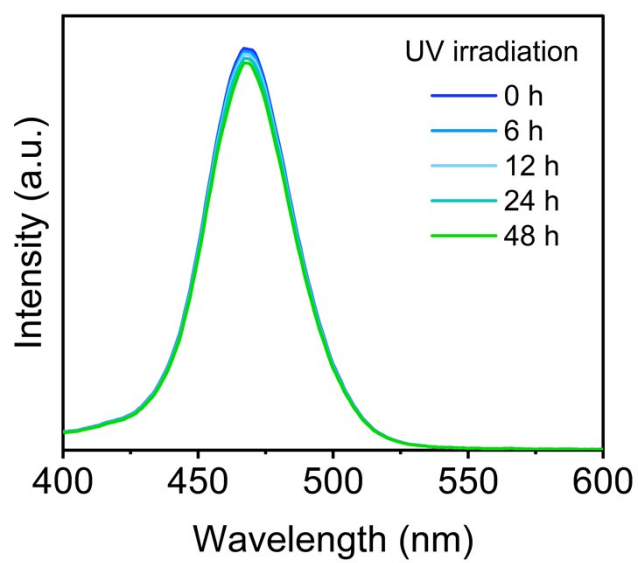

**Fig. S12** Luminescent stability of CsPbBr<sub>3</sub>@MCM-22-6h under 365 nm excitation wavelength for 48 h.

**Table S1** Comparison of BET surface areas and pore volumes of MCM-22 and CsPbBr<sub>3</sub>@MCM-22-6h.

| Samples                        | SBET                | Sext                | Vtotal               | Vmicro               | Vmeso                |
|--------------------------------|---------------------|---------------------|----------------------|----------------------|----------------------|
|                                | (m <sup>2</sup> /g) | (m <sup>2</sup> /g) | (cm <sup>3</sup> /g) | (cm <sup>3</sup> /g) | (cm <sup>3</sup> /g) |
| MCM-22                         | 415                 | 88                  | 0.510                | 0.168                | 0.342                |
| CsPbBr <sub>3</sub> @MCM-22-6h | 73                  | 40                  | 0.291                | 0.017                | 0.274                |

**Table S2** Weight losses of of MCM-22P-0.5h and MCM-22-6h.

| Samples      | Weight loss (%) |           |           |
|--------------|-----------------|-----------|-----------|
|              | 50-150°C        | 150-400°C | 400-800°C |
| MCM-22P-0.5h | 1.02            | 8.98      | 6.88      |
| MCM-22-6h    | 5.89            | 1.51      | 0.68      |

**Table S3** Comparisons of luminescence, particle size and stability of blue-emitting CsPbBr<sub>3</sub> PQDs encapsulated in various inorganic porous materials.

| Materials                               | Peak (nm) | Diameter (nm) | Stability               | Ref.      |
|-----------------------------------------|-----------|---------------|-------------------------|-----------|
| CsPbBr <sub>3</sub> @W-S-1              | 468       | 2.0           | High stability in water | 1         |
| CsPbBr <sub>3</sub> @SBA-15             | 487       | 3.1           | High stability in air   | 2         |
| CsPbBr <sub>3</sub> @m-SiO <sub>2</sub> | 453       | —             | High stability in air   | 3         |
| CsPbBr <sub>3</sub> @N-S-1              | 474       | 2.38          | High stability in water | 4         |
| CsPbBr <sub>3</sub> @MSN                | 470       | 3.0           | High stability in air   | 5         |
| CsPbBr <sub>3</sub> @MCM-22             | 467       | 2.1           | High stability in water | This work |

## References

1. H. Y. Zhang, B. L. Wang, Z. J. Niu, G. R. Chen, B. Y. Guan, J. Y. Li, and J. H. Yu, Ultrasmall water-stable CsPbBr<sub>3</sub> quantum dots with high intensity blue emission enabled by zeolite confinement engineering, *Mater. Horiz.*, 2023, **10**, 5079–5086.
2. V. Malgras, J. Henzie, T. Takeji, and Prof. Y. Yamauchi, Stable Blue Luminescent CsPbBr<sub>3</sub> Perovskite Nanocrystals Confined in Mesoporous Thin Films, *Angew. Chem. Int. Ed.* 2018, **57** 8881–8885.
3. S. N. Li, Y. R. Yang, J. H. Song, X. L. Meng, C. B. Bai, B. Wei, F. Ma, and L. Zhang, Static-spun mesoporous silica-coated CsPbBr<sub>3</sub> blue fibres: synthesis and fluorescence properties, *Nanoscale Res. Lett.*, 2024, **19**, 180.
4. Y. C. Zhang, H. K. Li, L. Han, and Y. Xu, Engineering Green-to Blue-Emitting CsPbBr<sub>3</sub> Quantum Dots in Nanozeolite with High Stability for Backlight Display Application, *Nano Lett.*, 2024, **24**, 16400–16407.
5. K. X. Cui, Y. Chen, K. Y. Xie, H. N. Peng, L. P. Ding, and Y. Fang, Nanoconfined Synthesis of CsPbBr<sub>3</sub> Quantum Dots: Enhanced Stability, Tunable Luminescence, and Sensitive Sensing Application, *ACS Appl. Mater. Interfaces.*, 2025, **17**, 20075–20086.
